# Supplementary material
Source: PubMed Central journal article supplement (PMC7050986)
Supplement: jiz549_suppl_supplementary_figure_4.pdf [file jiz549_suppl_supplementary_figure_4.pdf]

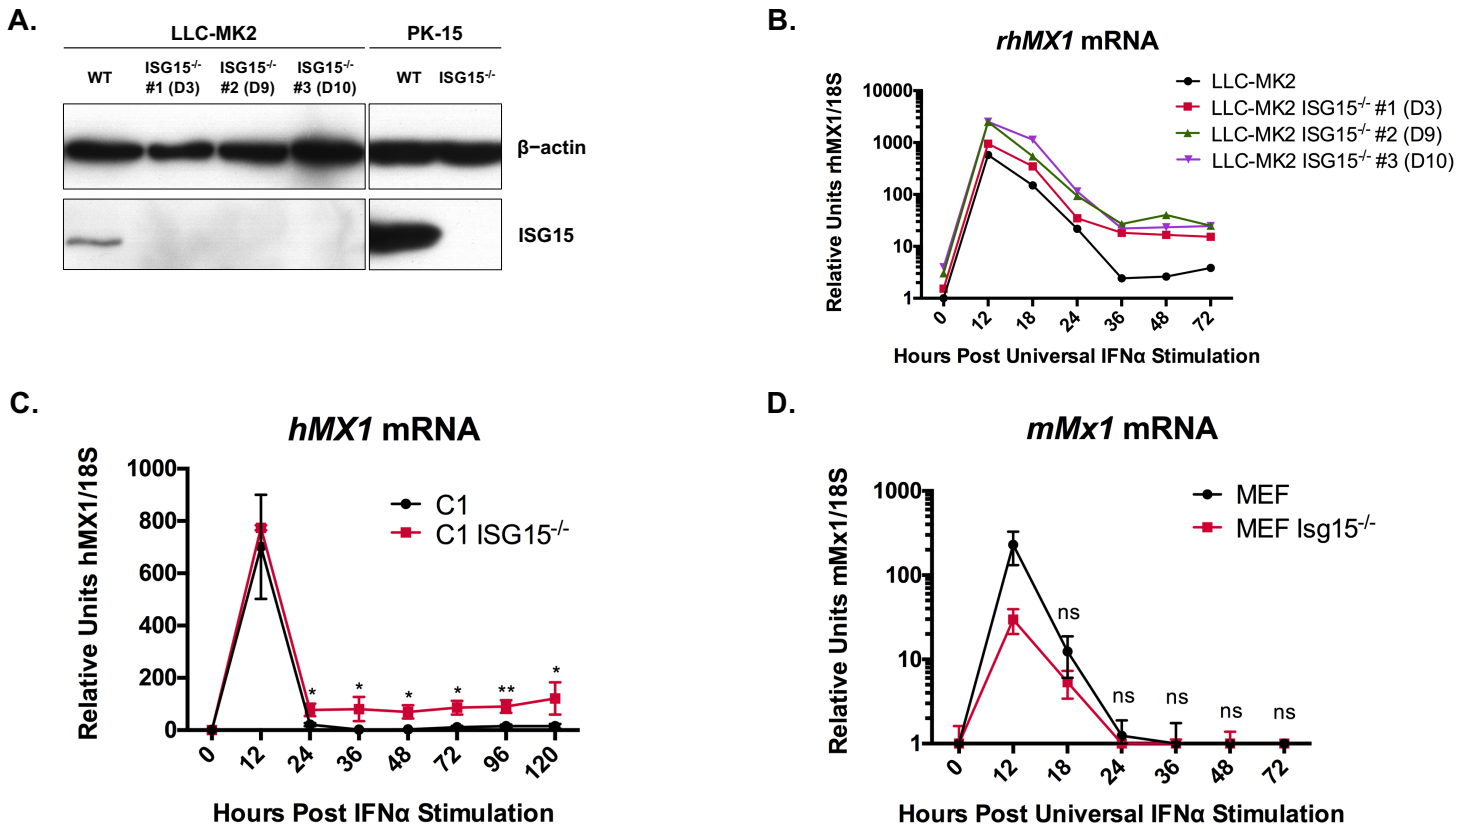

**Supplementary Figure 4 | (A) Successful knockout of ISG15 in LLC-MK2 and PK-15 cells.** WT and ISG15-KO LLC-MK2 and PK-15 cells were treated with 100 U/mL universal IFN $\alpha$  for 8 hours. Whole cell lysates were analyzed with western blotting using an ISG15 antibody with cross-species reactivity (ab233071). D3, D9, and D10 denote three different monoclonal cell populations of LLC-MK2 post CRISPR/Cas9-mediated knockout of ISG15. **(B-D) ISG expression of IFN-primed ISG15-deficient rhesus macaque, human, and murine cells.** WT and ISG15-knockout LLC-MK2 cells, hTert-immortalized human fibroblasts from a healthy donor (C1) and isogenic ISG15-KO C1 cells, and WT and ISG15-deficient MEFs were stimulated with 1000 IU/mL IFN- $\alpha$ 2b or 100 U/mL universal IFN- $\alpha$  for 12 hours, washed with PBS, and allowed to rest for various lengths of time. Rhesus macaque *MX1* (*rhMX1*) **(B)**, human *MX1* (*hMX1*) **(C)**, and murine *Mx1* (*mMx1*) **(D)** mRNA levels relative to 18S eukaryotic rRNA at indicated hours post stimulation were analyzed. Statistical comparison was performed with unpaired t tests. **B** shows a single experiment. **C** and **D** show a representative experiment with biological triplicates of two-three performed. Error bars, s.d. \* $p < 0.05$ , \*\* $p < 0.01$ , \*\*\* $p < 0.001$ , \*\*\*\* $p < 0.0001$ . NS, not significant.
